# Supplementary material for: The Anti-Cancer Effect of Mangifera indica L. Peel Extract is Associated to γH2AX-mediated Apoptosis in Colon Cancer Cells
Source: Antioxidants (Basel). 2019 Sep 22;8(10):422. doi: 10.3390/antiox8100422 (PMC6826946; doi:10.3390/antiox8100422)
Supplement: Supplementary file 1 [file antioxidants-08-00422-s001.pdf]

## The Anti-Cancer Effect of *Mangifera indica* L. Peel Extract is Associated to $\gamma$ H2AX-mediated Apoptosis in Colon Cancer Cells.

Marianna Lauricella, Valentina Lo Galbo, Cesare Cernigliaro, Antonella Maggio, Antonio Palumbo Piccionello, Giuseppe Calvaruso, Daniela Carlisi, Sonia Emanuele, Michela Giuliano and Antonella D'Anneo.

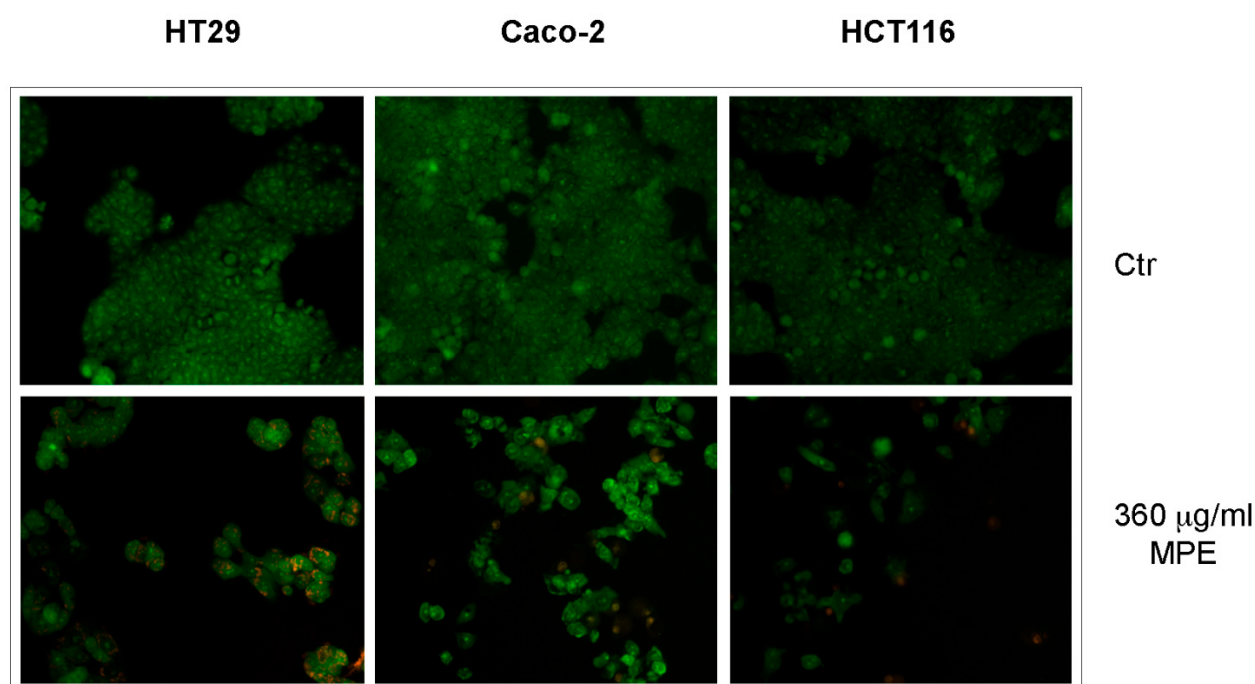

**Figure S1.** MPE treatment induces apoptotic cell death in colon cancer cells. Colon cancer cells were treated with MPE for 48 h, then cells were exposed to acridine orange/ethidium bromide dual staining as reported in Materials and Methods. Apoptotic cells were characterized by a granular yellow-green nuclear staining (early apoptotic cells) or condensed orange nuclear staining (late-apoptotic cells) compared to live cells (green fluorescent cells). Images were acquired using a Leica fluorescent microscope (original magnification 200X) and processed using Leica Q Fluoro software.

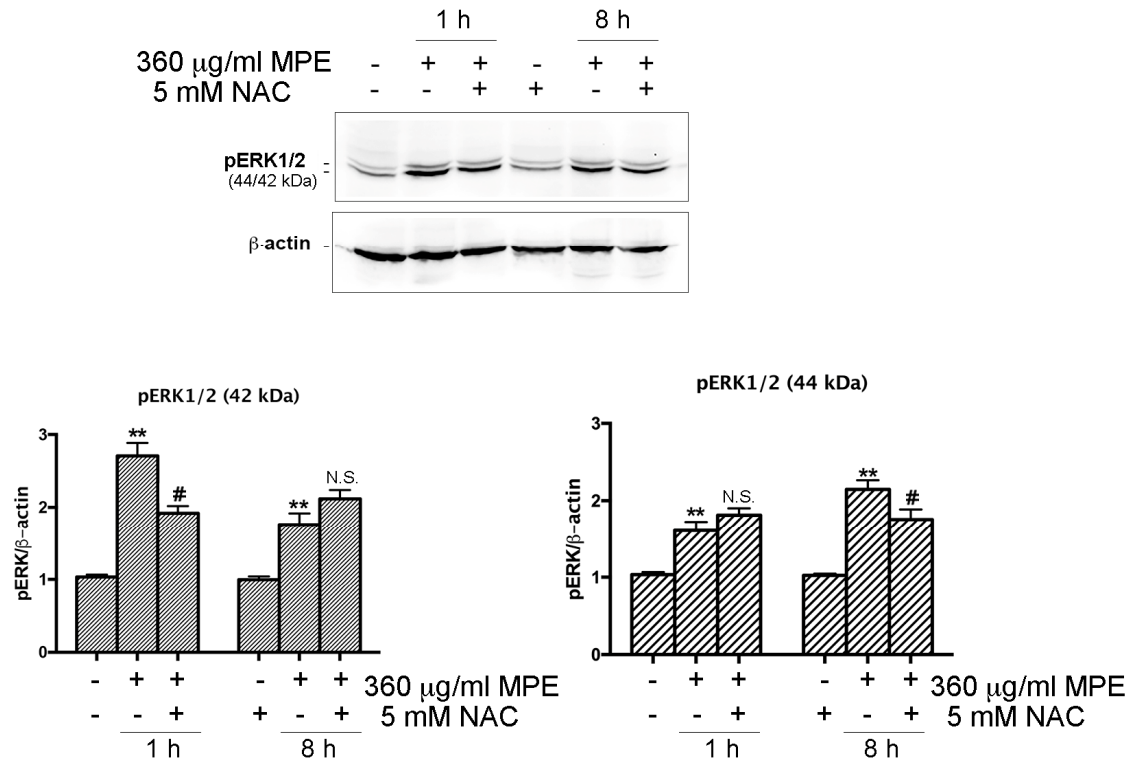

**Figure S2.** MPE treatment upregulates the main stress protein player pERK1/2. HT29 cells were treated with MPE for the indicated times in the presence or absence of 5 mM NAC. Lastly, western blotting analyses were performed in order to study MPE effects on the total level of pERK1/2 in the first phase of treatment (1-8 h). The correct protein loading was ascertained by immunoblotting for  $\beta$ -actin. The results are representative of three independent experiments and densitometry analysis histograms are reported normalized to  $\beta$ -actin. (\*\*)  $p < 0.01$  compared to the untreated sample. (#)  $p < 0.05$  compared to MPE-treated sample. N.S., not significant in respect to MPE-treated cells.
